# Supplementary material for: Exploration of Data Fusion Strategies Using Principal Component Analysis and Multiple Factor Analysis
Source: MDPI journal article supplement (doi:10.3390/beverages8040066), 2022-10-21
Supplement: s1 [file s1]

**Table S1:** Pairwise regression vector (RV) coefficients ( $p \leq 0.01$ ) for score configuration using IR raw data vs. its mathematical transformations using multiplicative scatter correction (MSC), first derivative (1<sup>st</sup> deriv), and their combinations before Principal Component Analysis (PCA).

| Data set    |               | 1st deriv | 1st deriv<br>MSC | MSC    | MSC 1st<br>deriv | raw    | 1st deriv | 1st deriv<br>MSC | MSC    | MSC 1st<br>deriv | raw    |
|-------------|---------------|-----------|------------------|--------|------------------|--------|-----------|------------------|--------|------------------|--------|
| AVN         | 1st deriv     | ↑ 1       | ↑ 0.99           | ↗ 0.81 | ↑ 0.98           | ↗ 0.83 | ↑ 1       | ↑ 0.97           | ↗ 0.89 | ↑ 0.97           | ↗ 0.84 |
|             | 1st deriv MSC | ↑ 0.99    | ↑ 1              | ↗ 0.82 | ↑ 0.99           | ↗ 0.78 | ↑ 0.97    | ↑ 1              | ↑ 0.9  | ↑ 0.99           | ↗ 0.74 |
|             | MSC           | ↗ 0.81    | ↗ 0.82           | ↑ 1    | ↗ 0.87           | ↗ 0.88 | ↗ 0.89    | ↑ 0.9            | ↑ 1    | ↑ 0.92           | ↗ 0.83 |
|             | MSC 1st deriv | ↑ 0.98    | ↑ 0.99           | ↗ 0.87 | ↑ 1              | ↗ 0.82 | ↑ 0.97    | ↑ 0.99           | ↑ 0.92 | ↑ 1              | ↗ 0.74 |
|             | raw           | ↗ 0.83    | ↗ 0.78           | ↗ 0.88 | ↗ 0.82           | ↑ 1    | ↗ 0.84    | ↗ 0.74           | ↗ 0.83 | ↗ 0.74           | ↑ 1    |
| CDB         | 1st deriv     | ↑ 1       | ↑ 0.98           | ↑ 0.92 | ↑ 0.98           | ↗ 0.89 | ↑ 1       | ↑ 0.98           | ↑ 0.91 | ↑ 0.98           | ↗ 0.86 |
|             | 1st deriv MSC | ↑ 0.98    | ↑ 1              | ↑ 0.94 | ↑ 1              | ↗ 0.78 | ↑ 0.98    | ↑ 1              | ↑ 0.9  | ↑ 0.99           | ↗ 0.76 |
|             | MSC           | ↑ 0.92    | ↑ 0.94           | ↑ 1    | ↑ 0.95           | ↗ 0.75 | ↑ 0.91    | ↑ 0.9            | ↑ 1    | ↑ 0.93           | ↗ 0.77 |
|             | MSC 1st deriv | ↑ 0.98    | ↑ 1              | ↑ 0.95 | ↑ 1              | ↗ 0.78 | ↑ 0.98    | ↑ 0.99           | ↑ 0.93 | ↑ 1              | ↗ 0.76 |
|             | raw           | ↗ 0.89    | ↗ 0.78           | ↗ 0.75 | ↗ 0.78           | ↑ 1    | ↗ 0.86    | ↗ 0.76           | ↗ 0.77 | ↗ 0.76           | ↑ 1    |
| DTK         | 1st deriv     | ↑ 1       | ↗ 0.88           | ↗ 0.81 | ↗ 0.89           | ↗ 0.89 | ↑ 1       | ↑ 0.98           | ↑ 0.92 | ↑ 0.97           | ↗ 0.89 |
|             | 1st deriv MSC | ↗ 0.88    | ↑ 1              | ↑ 0.95 | ↑ 1              | ↗ 0.89 | ↑ 0.98    | ↑ 1              | ↑ 0.97 | ↑ 1              | ↗ 0.78 |
|             | MSC           | ↗ 0.81    | ↑ 0.95           | ↑ 1    | ↑ 0.94           | ↑ 0.95 | ↑ 0.92    | ↑ 0.97           | ↑ 1    | ↑ 0.97           | ↗ 0.7  |
|             | MSC 1st deriv | ↗ 0.89    | ↑ 1              | ↑ 0.94 | ↑ 1              | ↗ 0.88 | ↑ 0.97    | ↑ 1              | ↑ 0.97 | ↑ 1              | ↗ 0.76 |
|             | raw           | ↗ 0.89    | ↗ 0.89           | ↑ 0.95 | ↗ 0.88           | ↑ 1    | ↗ 0.89    | ↗ 0.78           | ↗ 0.7  | ↗ 0.76           | ↑ 1    |
| FRV         | 1st deriv     | ↑ 1       | ↑ 0.97           | ↗ 0.88 | ↑ 0.95           | ↗ 0.88 | ↑ 1       | ↑ 0.95           | ↑ 0.91 | ↑ 0.94           | ↑ 0.9  |
|             | 1st deriv MSC | ↑ 0.97    | ↑ 1              | ↑ 0.9  | ↑ 1              | ↗ 0.75 | ↑ 0.95    | ↑ 1              | ↑ 0.93 | ↑ 1              | ↗ 0.72 |
|             | MSC           | ↗ 0.88    | ↑ 0.9            | ↑ 1    | ↑ 0.92           | ↗ 0.77 | ↑ 0.91    | ↑ 0.93           | ↑ 1    | ↑ 0.94           | ↗ 0.74 |
|             | MSC 1st deriv | ↑ 0.95    | ↑ 1              | ↑ 0.92 | ↑ 1              | ↗ 0.73 | ↑ 0.94    | ↑ 1              | ↑ 0.94 | ↑ 1              | ↗ 0.71 |
|             | raw           | ↗ 0.88    | ↗ 0.75           | ↗ 0.77 | ↗ 0.73           | ↑ 1    | ↑ 0.9     | ↗ 0.72           | ↗ 0.74 | ↗ 0.71           | ↑ 1    |
| KZC         | 1st deriv     | ↑ 1       | ↓ 0.44           | ↓ 0.37 | ↓ 0.46           | ↑ 0.98 | ↑ 1       | ↑ 0.97           | ↑ 0.91 | ↑ 0.97           | ↗ 0.88 |
|             | 1st deriv MSC | ↓ 0.44    | ↑ 1              | ↑ 0.99 | ↑ 0.99           | ↓ 0.38 | ↑ 0.97    | ↑ 1              | ↑ 0.93 | ↑ 1              | ↗ 0.76 |
|             | MSC           | ↓ 0.37    | ↑ 0.99           | ↑ 1    | ↑ 0.99           | ↓ 0.31 | ↑ 0.91    | ↑ 0.93           | ↑ 1    | ↑ 0.94           | ↗ 0.73 |
|             | MSC 1st deriv | ↓ 0.46    | ↑ 0.99           | ↑ 0.99 | ↑ 1              | ↓ 0.41 | ↑ 0.97    | ↑ 1              | ↑ 0.94 | ↑ 1              | ↗ 0.76 |
|             | raw           | ↑ 0.98    | ↓ 0.38           | ↓ 0.31 | ↓ 0.41           | ↑ 1    | ↗ 0.88    | ↗ 0.76           | ↗ 0.73 | ↗ 0.76           | ↑ 1    |
| PDB         | 1st deriv     | ↑ 1       | ↑ 0.98           | ↗ 0.82 | ↑ 0.96           | ↑ 0.92 | ↑ 1       | ↑ 0.96           | ↑ 0.91 | ↑ 0.95           | ↗ 0.85 |
|             | 1st deriv MSC | ↑ 0.98    | ↑ 1              | ↑ 0.9  | ↑ 0.99           | ↗ 0.89 | ↑ 0.96    | ↑ 1              | ↑ 0.94 | ↑ 1              | ↗ 0.74 |
|             | MSC           | ↗ 0.82    | ↑ 0.9            | ↑ 1    | ↑ 0.94           | ↗ 0.86 | ↑ 0.91    | ↑ 0.94           | ↑ 1    | ↑ 0.93           | ↗ 0.76 |
|             | MSC 1st deriv | ↑ 0.96    | ↑ 0.99           | ↑ 0.94 | ↑ 1              | ↑ 0.9  | ↑ 0.95    | ↑ 1              | ↑ 0.93 | ↑ 1              | ↗ 0.73 |
|             | raw           | ↑ 0.92    | ↗ 0.89           | ↗ 0.86 | ↑ 0.9            | ↑ 1    | ↗ 0.85    | ↗ 0.74           | ↗ 0.76 | ↗ 0.73           | ↑ 1    |
| Average     | overall       | ↗ 0.85    | ↗ 0.88           | ↗ 0.84 | ↗ 0.89           | ↗ 0.79 | ↑ 0.93    | ↑ 0.91           | ↗ 0.88 | ↑ 0.91           | ↗ 0.78 |
|             | without KZC   | ↑ 0.91    | ↑ 0.92           | ↗ 0.88 | ↑ 0.92           | ↗ 0.84 | ---       | ---              | ---    | ---              | ---    |
| Stdev       | Overall       | ↓ 0.17    | ↓ 0.16           | ↓ 0.16 | ↓ 0.15           | ↓ 0.17 | ↓ 0.04    | ↓ 0.1            | ↓ 0.08 | ↓ 0.1            | ↓ 0.06 |
|             | without KZC   | ↓ 0.06    | ↓ 0.08           | ↓ 0.06 | ↓ 0.07           | ↓ 0.06 | ---       | ---              | ---    | ---              | ---    |
| Overall     | min           | ↓ 0.37    | ↓ 0.38           | ↓ 0.31 | ↓ 0.41           | ↓ 0.31 | ↗ 0.84    | ↗ 0.72           | ↗ 0.7  | ↗ 0.71           | ↗ 0.7  |
|             | max           | ↑ 0.99    | ↑ 1              | ↑ 0.99 | ↑ 1              | ↑ 0.98 | ↑ 0.98    | ↑ 1              | ↑ 0.97 | ↑ 1              | ↑ 0.9  |
| Without KZC | min           | ↗ 0.81    | ↗ 0.75           | ↗ 0.75 | ↗ 0.73           | ↗ 0.73 | ---       | ---              | ---    | ---              | ---    |
|             | max           | ↑ 0.99    | ↑ 1              | ↑ 0.95 | ↑ 1              | ↑ 0.95 | ---       | ---              | ---    | ---              | ---    |

**Table S2:** Cumulative percentage explained variance (%EV) of the first two principal components of the PCA (VCC, ARP, UV-Vis, and IR) and first two dimensions of the CA (sensory) for individual data sets.

| CULTIVAR        | DATA SET | VCC | ARP | UV-VIS | INFRA-RED | SENSORY |
|-----------------|----------|-----|-----|--------|-----------|---------|
| CHENIN BLANC    | AVN      | 82  | 84  | 93     | 79        | 65      |
|                 | CDB      | 83  | 80  | 91     | 74        | 78      |
|                 | DTK      | 72  | 85  | 97     | 96        | 66      |
|                 | FRV      | 74  | 83  | 78     | 76        | 71      |
|                 | KZC      | 76  | 94  | 93     | 98        | 76      |
|                 | PDB      | 74  | 92  | 95     | 83        | 72      |
|                 | average  | 77  | 86  | 91     | 84        | 71      |
|                 | stdev    | 4   | 5   | 6      | 9         | 5       |
| SAUVIGNON BLANC | AVN      | 79  | 82  | 92     | 68        | 64      |
|                 | CDB      | 73  | 75  | 97     | 71        | 68      |
|                 | DTK      | 76  | 81  | 80     | 64        | 71      |
|                 | FRV      | 76  | 86  | 99     | 80        | 66      |
|                 | KZC      | 80  | 79  | 97     | 65        | 55      |
|                 | PDB      | 74  | 88  | 82     | 77        | 62      |
|                 | average  | 76  | 82  | 91     | 71        | 64      |
|                 | stdev    | 2   | 4   | 8      | 6         | 5       |
| OVERALL         | low      | 72  | 75  | 78     | 64        | 55      |
|                 | high     | 83  | 94  | 99     | 98        | 78      |
|                 | average  | 77  | 84  | 91     | 78        | 68      |
|                 | stdev    | 3   | 5   | 7      | 10        | 6       |

The sample sets are identified by three letters corresponding to each winery (i.e., AVN, CDB, DTK, FRV, KZC, PDB).

**Table S3:** Pairwise RV coefficients ( $p \leq 0.01$ ) for the scores of the individual data blocks.

| Data set | Data block | Chenin Blanc |        |        |         |        | Sauvignon Blanc |        |        |         |        |
|----------|------------|--------------|--------|--------|---------|--------|-----------------|--------|--------|---------|--------|
|          |            | ARP          | UV-Vis | IR     | Sensory | VCC    | ARP             | UV-Vis | IR     | Sensory | VCC    |
| AVN      | ARP        | ↑ 1          | ↗ 0.8  | ↓ 0.38 | ↗ 0.85  | ↗ 0.83 | ↑ 1             | ↗ 0.73 | ↓ 0.31 | ↗ 0.8   | ↗ 0.82 |
|          | UV-Vis     | ↗ 0.8        | ↑ 1    | ↓ 0.39 | ↗ 0.73  | ↗ 0.81 | ↗ 0.73          | ↑ 1    | ↓ 0.46 | ↗ 0.63  | ↗ 0.5  |
|          | IR         | ↓ 0.38       | ↓ 0.39 | ↑ 1    | ↗ 0.51  | ↗ 0.56 | ↓ 0.31          | ↓ 0.46 | ↑ 1    | ↗ 0.51  | ↓ 0.27 |
|          | Sensory    | ↗ 0.85       | ↗ 0.73 | ↗ 0.51 | ↑ 1     | ↗ 0.81 | ↗ 0.8           | ↗ 0.63 | ↗ 0.51 | ↑ 1     | ↗ 0.66 |
|          | VCC        | ↗ 0.83       | ↗ 0.81 | ↗ 0.56 | ↗ 0.81  | ↑ 1    | ↗ 0.82          | ↗ 0.5  | ↓ 0.27 | ↗ 0.66  | ↑ 1    |
| CDB      | ARP        | ↑ 1          | ↗ 0.79 | ↓ 0.47 | ↗ 0.87  | ↗ 0.63 | ↑ 1             | ↑ 0.93 | ↓ 0.47 | ↗ 0.6   | ↗ 0.5  |
|          | UV-Vis     | ↗ 0.79       | ↑ 1    | ↓ 0.39 | ↗ 0.67  | ↓ 0.39 | ↑ 0.93          | ↑ 1    | ↓ 0.31 | ↓ 0.43  | ↓ 0.33 |
|          | IR         | ↓ 0.47       | ↓ 0.39 | ↑ 1    | ↗ 0.71  | ↗ 0.54 | ↓ 0.47          | ↓ 0.31 | ↑ 1    | ↗ 0.72  | ↗ 0.75 |
|          | Sensory    | ↗ 0.87       | ↗ 0.67 | ↗ 0.71 | ↑ 1     | ↗ 0.72 | ↗ 0.6           | ↓ 0.43 | ↗ 0.72 | ↑ 1     | ↗ 0.85 |
|          | VCC        | ↗ 0.63       | ↓ 0.39 | ↗ 0.54 | ↗ 0.72  | ↑ 1    | ↗ 0.5           | ↓ 0.33 | ↗ 0.75 | ↗ 0.85  | ↑ 1    |
| DTK      | ARP        | ↑ 1          | ↗ 0.82 | ↓ 0.2  | ↗ 0.79  | ↗ 0.66 | ↑ 1             | ↑ 0.9  | ↓ 0.4  | ↗ 0.82  | ↗ 0.62 |
|          | UV-Vis     | ↗ 0.82       | ↑ 1    | ↓ 0.1  | ↗ 0.7   | ↓ 0.48 | ↑ 0.9           | ↑ 1    | ↗ 0.62 | ↗ 0.79  | ↗ 0.62 |
|          | IR         | ↓ 0.2        | ↓ 0.1  | ↑ 1    | ↓ 0.38  | ↓ 0.45 | ↓ 0.4           | ↗ 0.62 | ↑ 1    | ↗ 0.55  | ↗ 0.51 |
|          | Sensory    | ↗ 0.79       | ↗ 0.7  | ↓ 0.38 | ↑ 1     | ↗ 0.79 | ↗ 0.82          | ↗ 0.79 | ↗ 0.55 | ↑ 1     | ↗ 0.73 |
|          | VCC        | ↗ 0.66       | ↓ 0.48 | ↓ 0.45 | ↗ 0.79  | ↑ 1    | ↗ 0.62          | ↗ 0.62 | ↗ 0.51 | ↗ 0.73  | ↑ 1    |
| FRV      | ARP        | ↑ 1          | ↑ 0.9  | ↗ 0.71 | ↗ 0.78  | ↗ 0.55 | ↑ 1             | ↗ 0.83 | ↓ 0.38 | ↗ 0.73  | ↗ 0.6  |
|          | UV-Vis     | ↑ 0.9        | ↑ 1    | ↗ 0.67 | ↗ 0.73  | ↗ 0.58 | ↗ 0.83          | ↑ 1    | ↓ 0.21 | ↓ 0.46  | ↓ 0.45 |
|          | IR         | ↗ 0.71       | ↗ 0.67 | ↑ 1    | ↗ 0.78  | ↗ 0.69 | ↓ 0.38          | ↓ 0.21 | ↑ 1    | ↗ 0.61  | ↗ 0.62 |
|          | Sensory    | ↗ 0.78       | ↗ 0.73 | ↗ 0.78 | ↑ 1     | ↗ 0.73 | ↗ 0.73          | ↓ 0.46 | ↗ 0.61 | ↑ 1     | ↗ 0.73 |
|          | VCC        | ↗ 0.55       | ↗ 0.58 | ↗ 0.69 | ↗ 0.73  | ↑ 1    | ↗ 0.6           | ↓ 0.45 | ↗ 0.62 | ↗ 0.73  | ↑ 1    |
| KZC      | ARP        | ↑ 1          | ↗ 0.78 | ↓ 0.33 | ↗ 0.62  | ↗ 0.57 | ↑ 1             | ↗ 0.72 | ↗ 0.74 | ↗ 0.69  | ↗ 0.58 |
|          | UV-Vis     | ↗ 0.78       | ↑ 1    | ↗ 0.56 | ↗ 0.74  | ↗ 0.52 | ↗ 0.72          | ↑ 1    | ↗ 0.79 | ↓ 0.43  | ↓ 0.34 |
|          | IR         | ↓ 0.33       | ↗ 0.56 | ↑ 1    | ↓ 0.47  | ↓ 0.41 | ↗ 0.74          | ↗ 0.79 | ↑ 1    | ↗ 0.66  | ↓ 0.46 |
|          | Sensory    | ↗ 0.62       | ↗ 0.74 | ↓ 0.47 | ↑ 1     | ↗ 0.6  | ↗ 0.69          | ↓ 0.43 | ↗ 0.66 | ↑ 1     | ↗ 0.66 |
|          | VCC        | ↗ 0.57       | ↗ 0.52 | ↓ 0.41 | ↗ 0.6   | ↑ 1    | ↗ 0.58          | ↓ 0.34 | ↓ 0.46 | ↗ 0.66  | ↑ 1    |
| PDB      | ARP        | ↑ 1          | ↑ 0.93 | ↗ 0.67 | ↗ 0.63  | ↗ 0.76 | ↑ 1             | ↑ 0.92 | ↗ 0.68 | ↗ 0.71  | ↓ 0.45 |
|          | UV-Vis     | ↑ 0.93       | ↑ 1    | ↗ 0.62 | ↗ 0.59  | ↗ 0.66 | ↑ 0.92          | ↑ 1    | ↗ 0.62 | ↗ 0.67  | ↗ 0.51 |
|          | IR         | ↗ 0.67       | ↗ 0.62 | ↑ 1    | ↗ 0.86  | ↗ 0.58 | ↗ 0.68          | ↗ 0.62 | ↑ 1    | ↗ 0.66  | ↓ 0.42 |
|          | Sensory    | ↗ 0.63       | ↗ 0.59 | ↗ 0.86 | ↑ 1     | ↗ 0.67 | ↗ 0.71          | ↗ 0.67 | ↗ 0.66 | ↑ 1     | ↗ 0.63 |
|          | VCC        | ↗ 0.76       | ↗ 0.66 | ↗ 0.58 | ↗ 0.67  | ↑ 1    | ↓ 0.45          | ↗ 0.51 | ↓ 0.42 | ↗ 0.63  | ↑ 1    |

The sample sets are identified by three letters corresponding to each winery (i.e., AVN, CDB, DTK, FRV, KZC, PDB).

**Table S4:** Pairwise RV coefficients ( $p \leq 0.01$ ) for the PCA scores of the chemistry data blocks vs. low-level PCA fused model.

| Data set | Data block | Chenin Blanc                                                                        |      | Sauvignon Blanc                                                                     |      |
|----------|------------|-------------------------------------------------------------------------------------|------|-------------------------------------------------------------------------------------|------|
| AVN      | IR         |    | 0.9  |    | 0.88 |
|          | ARP        |    | 0.66 |    | 0.61 |
|          | VCC        |    | 0.8  |    | 0.47 |
|          | UV-Vis     |    | 0.75 |    | 0.82 |
| CDB      | IR         |    | 0.88 |    | 0.85 |
|          | ARP        |    | 0.74 |    | 0.83 |
|          | VCC        |    | 0.6  |    | 0.72 |
|          | UV-Vis     |    | 0.78 |    | 0.76 |
| DTK      | IR         |    | 0.88 |    | 0.94 |
|          | ARP        |    | 0.56 |    | 0.67 |
|          | VCC        |    | 0.64 |    | 0.63 |
|          | UV-Vis     |    | 0.56 |    | 0.85 |
| FRV      | IR         |    | 0.95 |    | 0.83 |
|          | ARP        |    | 0.85 |    | 0.75 |
|          | VCC        |    | 0.73 |    | 0.72 |
|          | UV-Vis     |    | 0.86 |    | 0.72 |
| KZC      | IR         |    | 0.96 |    | 0.95 |
|          | ARP        |    | 0.53 |    | 0.78 |
|          | VCC        |    | 0.51 |    | 0.46 |
|          | UV-Vis     |    | 0.77 |    | 0.94 |
| PDB      | IR         |    | 0.92 |    | 0.93 |
|          | ARP        |   | 0.88 |   | 0.86 |
|          | VCC        |  | 0.69 |  | 0.54 |
|          | UV-Vis     |  | 0.88 |  | 0.86 |

VCC – volatile compounds composition, ARP – antioxidant-related parameters, UV-Vis – ultraviolet visible spectra, IR – infrared spectra, PCA – principal component analysis. The sample sets are identified by three letters corresponding to each winery (i.e., AVN, CDB, DTK, FRV, KZC, PDB).

**Table S5:** Pairwise RV coefficients ( $p \leq 0.01$ ) between MFA and individual data blocks PCA/CA.

| Data set | Data Block | Chenin Blanc                                                                             | Sauvignon Blanc                                                                          |
|----------|------------|------------------------------------------------------------------------------------------|------------------------------------------------------------------------------------------|
| AVN      | IR         |  0.9    |  0.88   |
|          | ARP        |  0.67   |  0.61   |
|          | VCC        |  0.8    |  0.45   |
|          | UV-Vis     |  0.76   |  0.82   |
|          | Sensory    |  0.73   |  0.68   |
| CDB      | IR         |  0.88   |  0.86   |
|          | ARP        |  0.75   |  0.83   |
|          | VCC        |  0.6    |  0.72   |
|          | UV-Vis     |  0.78   |  0.76   |
|          | Sensory    |  0.84   |  0.74   |
| DTK      | IR         |  0.88   |  0.93   |
|          | ARP        |  0.57   |  0.68   |
|          | VCC        |  0.65   |  0.64   |
|          | UV-Vis     |  0.56   |  0.86   |
|          | Sensory    |  0.66   |  0.73   |
| FRV      | IR         |  0.95   |  0.83   |
|          | ARP        |  0.85   |  0.75   |
|          | VCC        |  0.74   |  0.72   |
|          | UV-Vis     |  0.86   |  0.72   |
|          | Sensory    |  0.84   |  0.71   |
| KZC      | IR         |  0.96  |  0.96  |
|          | ARP        |  0.53 |  0.79 |
|          | VCC        |  0.52 |  0.46 |
|          | UV-Vis     |  0.78 |  0.93 |
|          | Sensory    |  0.63 |  0.61 |
| PDB      | IR         |  0.92 |  0.93 |
|          | ARP        |  0.88 |  0.86 |
|          | VCC        |  0.69 |  0.55 |
|          | UV-Vis     |  0.88 |  0.86 |
|          | Sensory    |  0.82 |  0.75 |

The sample sets are identified by three letters corresponding to each winery (i.e., AVN, CDB, DTK, FRV, KZC, PDB).
